# Supplementary material for: Unveiling the Venom Composition of the Colombian Coral Snakes Micrurus helleri, M. medemi, and M. sangilensis
Source: MDPI journal article supplement (doi:10.3390/toxins15110622), 2023-10-24
Supplement: s1 [file s1]

# Unveiling the venom composition of the Colombian coral snakes *Micrurus helleri*, *M. medemi*, and *M. sangilensis*

## Supplementary Table

**Supplemental Table 1.** Predominant proteomic composition of various coral snake species in the Americas

| Species                                                  | PLA <sub>2</sub><br>(%) | 3FTx<br>(%) | Location                              | Dominance        | Group   | Other toxins |             | Reference |
|----------------------------------------------------------|-------------------------|-------------|---------------------------------------|------------------|---------|--------------|-------------|-----------|
|                                                          |                         |             |                                       |                  |         | SVMP<br>(%)  | SVSP<br>(%) |           |
| <i>M. alleni</i>                                         | 10.9                    | 77.3        | Caribbean<br>Costa Rica               | 3FTx             | Monadal | 1.2          | ND          | [1]       |
| <i>M. altirostris</i>                                    | 13.7                    | 79.5        | South Brazil                          | 3FTx             | Triadal | 0.9          | ND          | [2]       |
| <i>M. clarki</i>                                         | 36.5                    | 48.2        | Costa Rica<br>Pacific                 | 3FTx             | Monadal | 1.6          | 1.0         | [3]       |
| <i>M. corallinus</i>                                     | 11.9                    | 81.7        | Brazil                                | 3FTx             | Monadal | 2.4          | ND          | [2]       |
| <i>M. dumerilii</i>                                      | 52.0                    | 28.1        | Antioquia,<br>Colombia                | PLA <sub>2</sub> | Monadal | 1.8          | 1.9         | [4]       |
| <i>M. frontalis</i>                                      | 49.2                    | 42.4        | Sao Paulo,<br>Brazil                  | PLA <sub>2</sub> | Triadal | 0.96         | ND          | [5]       |
| <i>M. fulvius</i>                                        | 58.3                    | 24.9        | Florida, USA                          | PLA <sub>2</sub> | Monadal | NQ           | ND          | [6]       |
| <i>M. helleri</i>                                        | 62.5                    | 21.1        | Leticia,<br>Colombia                  | PLA <sub>2</sub> | Triadal | ND           | ND          | [7]       |
| <i>M. helleri</i>                                        | 72.1                    | 17.8        | Nangaritza,<br>Ecuador                | PLA <sub>2</sub> | Triadal | ND           | ND          | [8]       |
| <i>M. helleri</i>                                        | 40.6                    | 14.1        | Villagarzón,<br>Putumayo,<br>Colombia | PLA <sub>2</sub> | Triadal | ND           | ND          | This work |
| <i>M. ibiboboca</i>                                      | 66.5                    | 13.5        | Bahía, Brazil                         | PLA <sub>2</sub> | Triadal | 2.5          | ND          | [7]       |
| <i>M. lemniscatus<br/>carvalhoi</i>                      | 20.2                    | 76.7        | Sao Paulo,<br>Brazil                  | 3FTx             | Triadal | 1.1          | ND          | [7]       |
| <i>M. lemniscatus<br/>carvalhoi</i>                      | 22.1                    | 71.3        | Rio de Janeiro,<br>Brazil             | 3FTx             | Triadal | 0.8          | ND          | [7]       |
| <i>M. medemi</i>                                         | 43.1                    | 17.7        | Villavicencio,<br>Meta, Colombia      | PLA <sub>2</sub> | Monadal | ND           | ND          | This work |
| <i>M. mipartitus</i>                                     | 19.1                    | 63.4        | Esmeraldas,<br>Ecuador                | 3FTx             | Bicolor | ND           | ND          | [8]       |
| <i>M. mipartitus</i>                                     | 29.0                    | 61.1        | Antioquia,<br>Colombia                | 3FTx             | Bicolor | 1.6          | 1.3         | [9]       |
| <i>M. mipartitus</i>                                     | 8.2                     | 83.0        | Costa Rica                            | 3FTx             | Bicolor | 3.6          | ND          | [9]       |
| <i>M. mipartitus</i><br>( <i>M.<br/>multifasciatus</i> ) | 8.2                     | 83.0        | Costa Rica                            | 3FTx             | Bicolor | 3.6          | ND          | [9]       |

|                         |      |      |                                      |                  |         |      |     |           |
|-------------------------|------|------|--------------------------------------|------------------|---------|------|-----|-----------|
| <i>M. mosquitensis</i>  | 55.6 | 22.5 | Caribbean<br>Costa Rica              | PLA <sub>2</sub> | Monadal | 2.6  | 0.5 | [1]       |
| <i>M. nigrocinctus</i>  | 48.0 | 38.0 | Costa Rica                           | PLA <sub>2</sub> | Monadal | 4.3  | 0.7 | [10]      |
| <i>M. pyrrhocryptus</i> | 17.0 | 27.0 | Cordoba,<br>Argentina                | 3FTx             | Triadal | 12.0 | 7.0 | [11]      |
| <i>M. ruatanus</i>      | 29.8 | 46.4 | Roatan,<br>Honduras<br>(Confiscated) | 3FTx             | Monadal | 2.7  | 1.2 | [12]      |
| <i>M. sangilensis</i>   | 30.4 | 17.7 | San Gil,<br>Santander,<br>Colombia   | PLA <sub>2</sub> | Monadal | ND   | ND  | This work |
| <i>M. spixii</i>        | 37.4 | 56.5 | Pará, Brazil                         | 3FTx             | Triadal | ND   | ND  | [5]       |
| <i>M. surinamensis</i>  | 4.2  | 95.4 | Rondonia,<br>Brazil                  | 3FTx             | Triadal | ND   | ND  | [5]       |
| <i>M. tener</i>         | 45.6 | 37.5 | Tamaulipas,<br>Mexico                | PLA <sub>2</sub> | Monadal | ND   | ND  | [13]      |
| <i>M. tschudii</i>      | 4.1  | 95.2 | Peruvian<br>Pacific                  | 3FTx             | Triadal | ND   | ND  | [14]      |
| <i>M. yatesi</i>        | 54.7 | 20.2 | Pacific Costa<br>Rica                | PLA <sub>2</sub> | Monadal | 7.6  | 1.4 | [15]      |

PLA<sub>2</sub>: Phospholipases A<sub>2</sub>, 3FTx: three-finger toxins, SVMP: snake venom metalloproteinases, SVSP: snake venom serine proteases, ND: Not determined, NQ: Determined but not quantified.

## References

1. Fernández, J.; Vargas-Vargas, N.; Pla, D.; Sasa, M.; Rey-Suárez, P.; Sanz, L.; Gutiérrez, J.M.; Calvete, J.; Lomonte, B. Snake venomomics of *Micrurus alleni* and *Micrurus mosquitensis* from the Caribbean region of Costa Rica reveals two divergent compositional patterns in New World elapids. *Toxicon* **2015**, *107*, 217–233, doi:10.1016/j.toxicon.2015.08.016.
2. Corrêa-Netto, C.; Junqueira-De-Azevedo, I. de L.M.; Silva, D.A.; Ho, P.L.; Leitão-De-Araújo, M.; Alves, M.L.M.; Sanz, L.; Foguel, D.; Zingali, R.B.; Calvete, J. Snake venomomics and venom gland transcriptomic analysis of Brazilian coral snakes, *Micrurus altirostris* and *M. corallinus*. *J. Proteomics* **2011**, *74*, 1795–1809, doi:10.1016/j.jprot.2011.04.003.
3. Lomonte, B.; Sasa, M.; Rey-Suárez, P.; Bryan, W.; Gutiérrez, J.M.J.M. Venom of the coral snake *Micrurus clarki*: Proteomic profile, toxicity, immunological cross-neutralization, and characterization of a three-finger Toxin. *Toxins (Basel)*. **2016**, *8*, doi:10.3390/toxins8050138.
4. Rey-Suárez, P.; Núñez, V.; Fernández, J.; Lomonte, B.; Nuñez, V.; Fernández, J.; Lomonte, B. Integrative characterization of the venom of the coral snake *Micrurus dumerilii* (Elapidae) from Colombia: Proteome, toxicity, and cross-neutralization by antivenom. *J. Proteomics* **2016**, *136*, 262–273, doi:10.1016/j.jprot.2016.02.006.
5. Sanz, L.; de Freitas-Lima, L.N.; Quesada-Bernat, S.; Graça-de-Souza, V.K.; Soares, A.M.; Calderón, L. de A.; Calvete, J.J.; Caldeira, C.A.S. Comparative venomomics of Brazilian coral snakes: *Micrurus frontalis*, *Micrurus spixii* spixii, and *Micrurus surinamensis*. *Toxicon* **2019**, *166*, 39–45, doi:10.1016/j.toxicon.2019.05.001.
6. Vergara, I.; Pedraza-Escalona, M.; Paniagua, D.; Restano-Cassulini, R.; Zamudio, F.; Batista, C.V.F.; Possani, L.D.; Alagón, A. Eastern coral snake *Micrurus fulvius* venom toxicity in mice is mainly determined by neurotoxic phospholipases A<sub>2</sub>. *J. Proteomics* **2014**, *105*, 295–306, doi:10.1016/j.jprot.2014.02.027.
7. Sanz, L.; Quesada-Bernat, S.; Ramos, T.; Casais-e-Silva, L.L.; Corrêa-Netto, C.; Silva-Haad, J.J.; Sasa, M.; Lomonte, B.; Calvete, J.J. New insights into the phylogeographic distribution of the 3FTx/PLA 2 venom

dichotomy across genus *Micrurus* in South America. *J. Proteomics* **2019**, *200*, 90–101, doi:10.1016/j.jprot.2019.03.014.

8. Hernández-Altamirano, J.A.; Salazar-Valenzuela, D.; Medina-Villamizar, E.J.; Quirola, D.R.; Patel, K.; Vaiyapuri, S.; Lomonte, B.; Almeida, J.R. First Insights into the Venom Composition of Two Ecuadorian Coral Snakes. *Int. J. Mol. Sci.* **2022**, *23*, doi:10.3390/ijms232314686.
9. Rey-Suárez, P.; Núñez, V.; Gutiérrez, J.M.; Lomonte, B. Proteomic and biological characterization of the venom of the redbellied coral snake, *Micrurus mipartitus* (Elapidae), from Colombia and Costa Rica. *J. Proteomics* **2011**, *75*, 655–667, doi:10.1016/j.jprot.2011.09.003.
10. Fernández, J.; Alape-Girón, A.; Angulo, Y.; Sanz, L.; Gutiérrez, J.M.; Calvete, J.; Lomonte, B.; Fernández, J.; Alape-Girón, A.; Angulo, Y.; et al. Venomic and Antivenomic Analyses of the Central American Coral Snake, *Micrurus nigrocinctus* (Elapidae). *J. Proteome Res.* **2011**, *10*, 1816–1827, doi:10.1021/pr101091a.
11. Olamendi-Portugal, T.; Batista, C.V.F.; Pedraza-Escalona, M.; Restano-Cassulini, R.; Zamudio, F.Z.; Benard-Valle, M.; Rafael de Roodt, A.; Possani, L.D. New insights into the proteomic characterization of the coral snake *Micrurus pyrrhocryptus* venom. *Toxicon* **2018**, *153*, 23–31, doi:10.1016/j.toxicon.2018.08.003.
12. Lippa, E.; Török, F.; Gómez, A.; Corrales, G.; Chacón, D.; Sasa, M.; Gutiérrez, J.M.; Lomonte, B.; Fernández, J. First look into the venom of Roatan Island's critically endangered coral snake *Micrurus ruatanus*: Proteomic characterization, toxicity, immunorecognition and neutralization by an antivenom. *J. Proteomics* **2019**, *198*, 177–185, doi:10.1016/j.jprot.2019.01.007.
13. Bénard-Valle, M.; Carbajal-Saucedo, A.; de Roodt, A.; López-Vera, E.; Alagón, A. Biochemical characterization of the venom of the coral snake *Micrurus tener* and comparative biological activities in the mouse and a reptile model. *Toxicon* **2014**, *77*, 6–15, doi:10.1016/j.toxicon.2013.10.005.
14. Sanz, L.; Pla, D.; Pérez, A.; Rodríguez, Y.; Zavaleta, A.; Salas, M.; Lomonte, B.; Calvete, J. Venomic analysis of the poorly studied desert coral snake, *Micrurus tschudii* *tschudii*, supports the 3FTx/PLA2 dichotomy across *Micrurus* venoms. *Toxins (Basel)*. **2016**, *8*, 9–12, doi:10.3390/toxins8060178.
15. Mena, G.; Chaves-Araya, S.; Chacón, J.; Török, E.; Török, F.; Bonilla, F.; Sasa, M.; Gutiérrez, J.M.; Lomonte, B.; Fernández, J. Proteomic and toxicological analysis of the venom of *Micrurus yatesi* and its neutralization by an antivenom. *Toxicon X* **2022**, *13*, doi:10.1016/j.toxcx.2022.100097.
